# Supplementary material for: Deletion of the Autism-Associated Protein SHANK3 Abolishes Structural Synaptic Plasticity after Brain Trauma
Source: MDPI journal article supplement (doi:10.3390/ijms23116081), 2022-05-29
Supplement: s1 [file s1]

## Supplementary Information

# Deletion of the Autism-Associated Protein Shank3 Abolishes Synaptic Plasticity After Brain Trauma

Carolina Urrutia-Ruiz, Daniel Rombach, Silvia Cursano, Susanne Gerlach-Arbeiter, Michael Schoen, Juergen Bockmann, Maria Demestre and Tobias M Boeckers

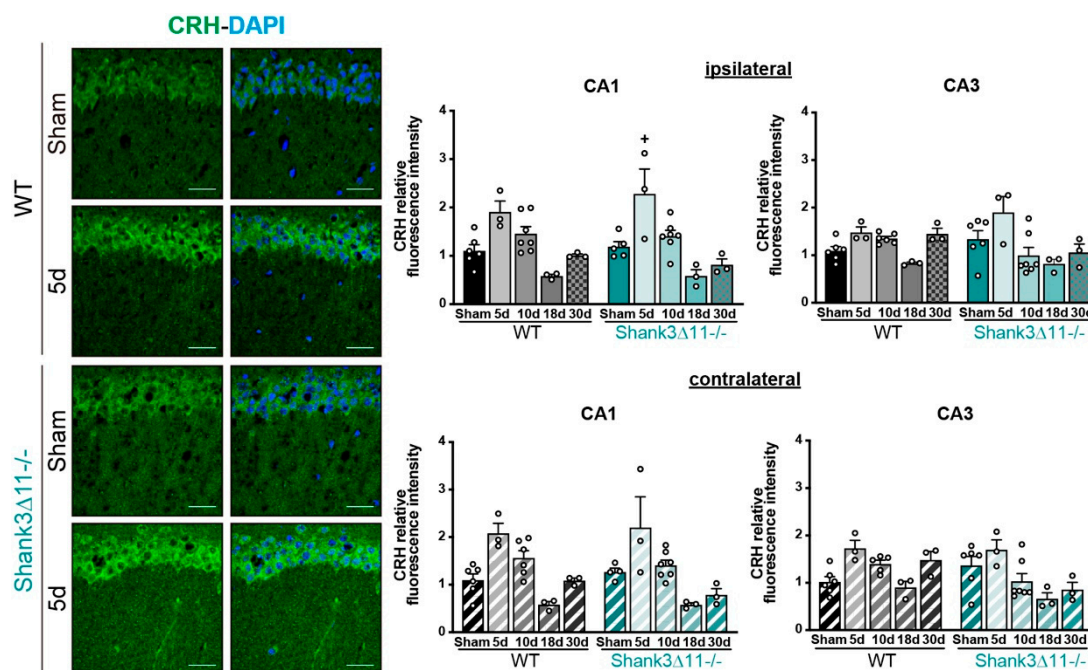

**Figure S1.** Corticotropin-Releasing Hormone (CRH) expression slightly increased in *Shank3* $\Delta 11$ <sup>-/-</sup> animals following mTBI. CRH immunostaining (green) and DAPI (blue) for the ipsilateral and contralateral CA1 and CA3 hippocampus. Representative images of the ipsilateral CA1 region (scale bar 20  $\mu$ m) (left panel) of WT sham and after five dpi (upper left panel) and *Shank3* $\Delta 11$ <sup>-/-</sup> sham and after five dpi. CRH fluorescence quantification in the CA1 and CA3 hippocampus on the ipsilateral hippocampus in WT (filled black bars) and *Shank3* $\Delta 11$ <sup>-/-</sup> mice (filled turquoise bars) (right panel), and for the contralateral side in WT (hatched black bars) and *Shank3* $\Delta 11$ <sup>-/-</sup> mice (hatched turquoise bars). N=3-7. Data are shown as mean  $\pm$  SEM. Data sets were analyzed using two-way ANOVA (genotype  $\times$  mTBI) and Bonferroni's post hoc comparison test. [Ipsilateral CA1: genotype  $F(1, 33) = 0.1422$ ,  $p = 0.7085$ ; mTBI  $F(4, 33) = 15.73$ ,  $p < 0.0001$ ; genotype  $\times$  mTBI  $F(4, 33) = 0.5429$ ,  $p = 0.7053$ . Ipsilateral CA3: genotype  $F(1, 34) = 0.01073$ ,  $p = 0.9181$ ; mTBI  $F(4, 34) = 5.528$ ,  $p = 0.0015$ ; genotype  $\times$  mTBI  $F(4, 34) = 1.973$ ,  $p = 0.1209$ ]; [Contralateral CA1: genotype  $F(1, 31) = 0.06393$ ,  $p = 0.8021$ ; mTBI  $F(4, 31) = 14.55$ ,  $p < 0.0001$ ; genotype  $\times$  mTBI  $F(4, 31) = 0.4763$ ,  $p = 0.7528$ . Contralateral CA3: genotype  $F(1, 33) = 2.081$ ,  $p = 0.1586$ ; mTBI  $F(4, 33) = 1.774$ ,  $p = 0.1576$ ; genotype  $\times$  mTBI  $F(4, 33) = 1.774$ ,  $p = 0.1576$ ] (+  $p < 0.05$ : comparison regarding *Shank3* $\Delta 11$ <sup>-/-</sup> sham animals).

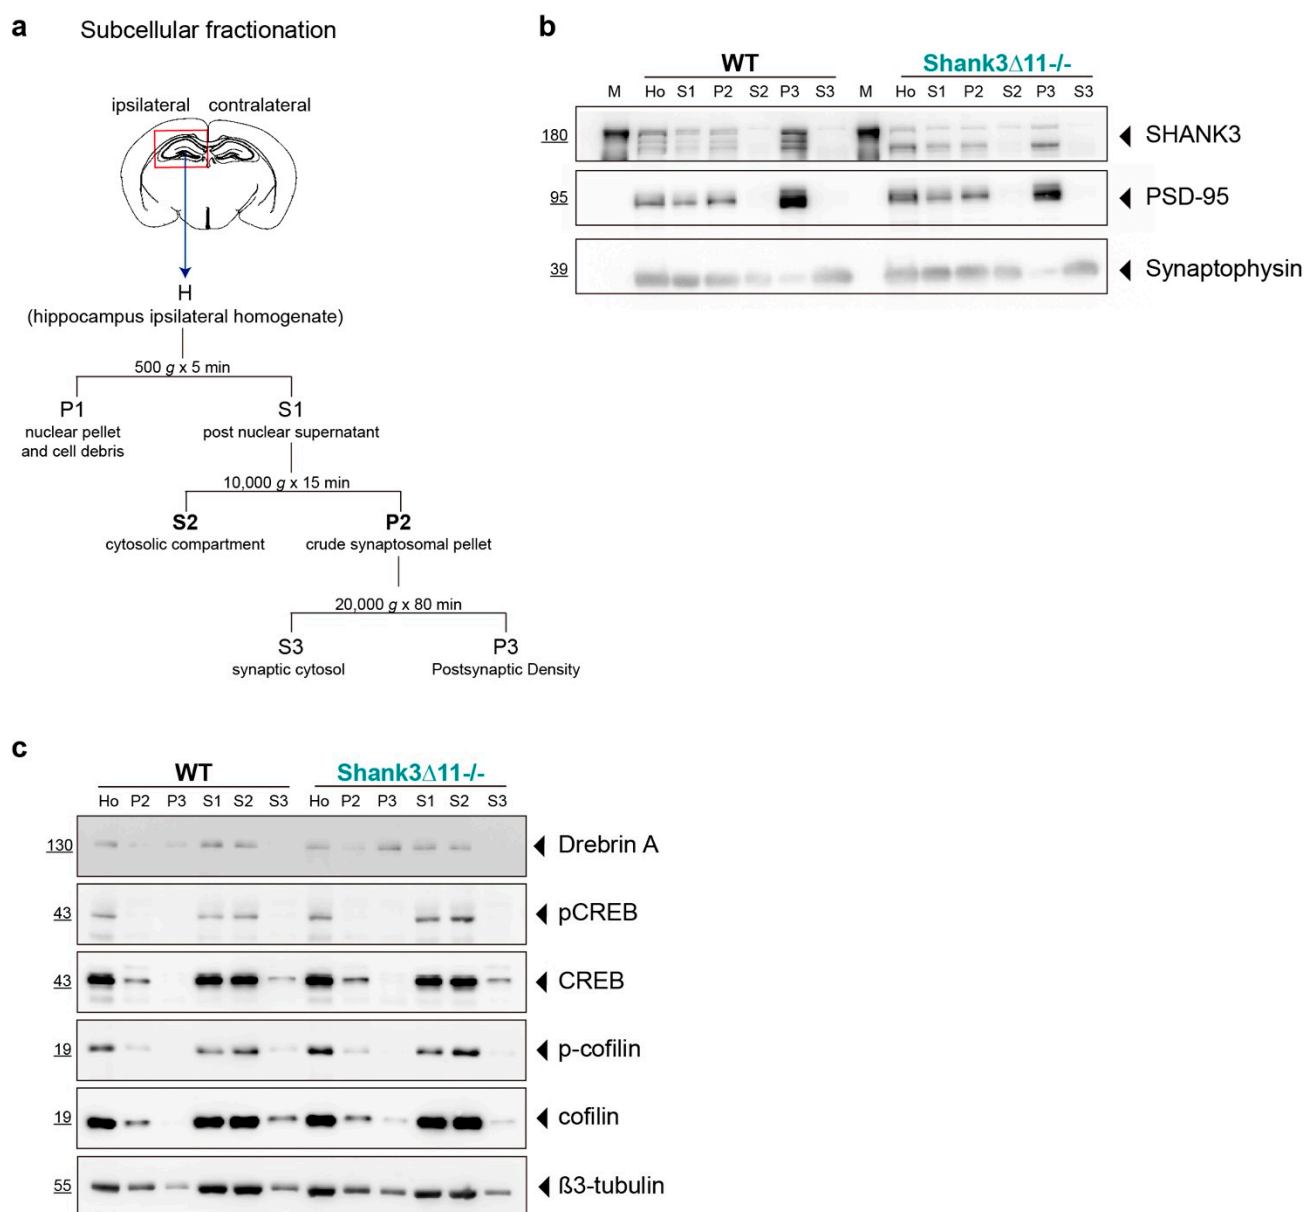

**Figure S2.** Scheme of differential subcellular fractionation steps and a screening performed for synaptic plasticity-related proteins. (a) Diagram of the differential centrifugation conducted in the ipsilateral hippocampus. In bold are the fractions used in this study. (b) Representative western blots of sham WT and *Shank3 $\Delta$ 11-/-* animals assessing the quality of the subcellular fractionation. M (protein ladder). (c) Western blot was performed to screen the enrichment of different structural and functional synaptic plasticity proteins in the fractions obtained from the differential centrifugation.

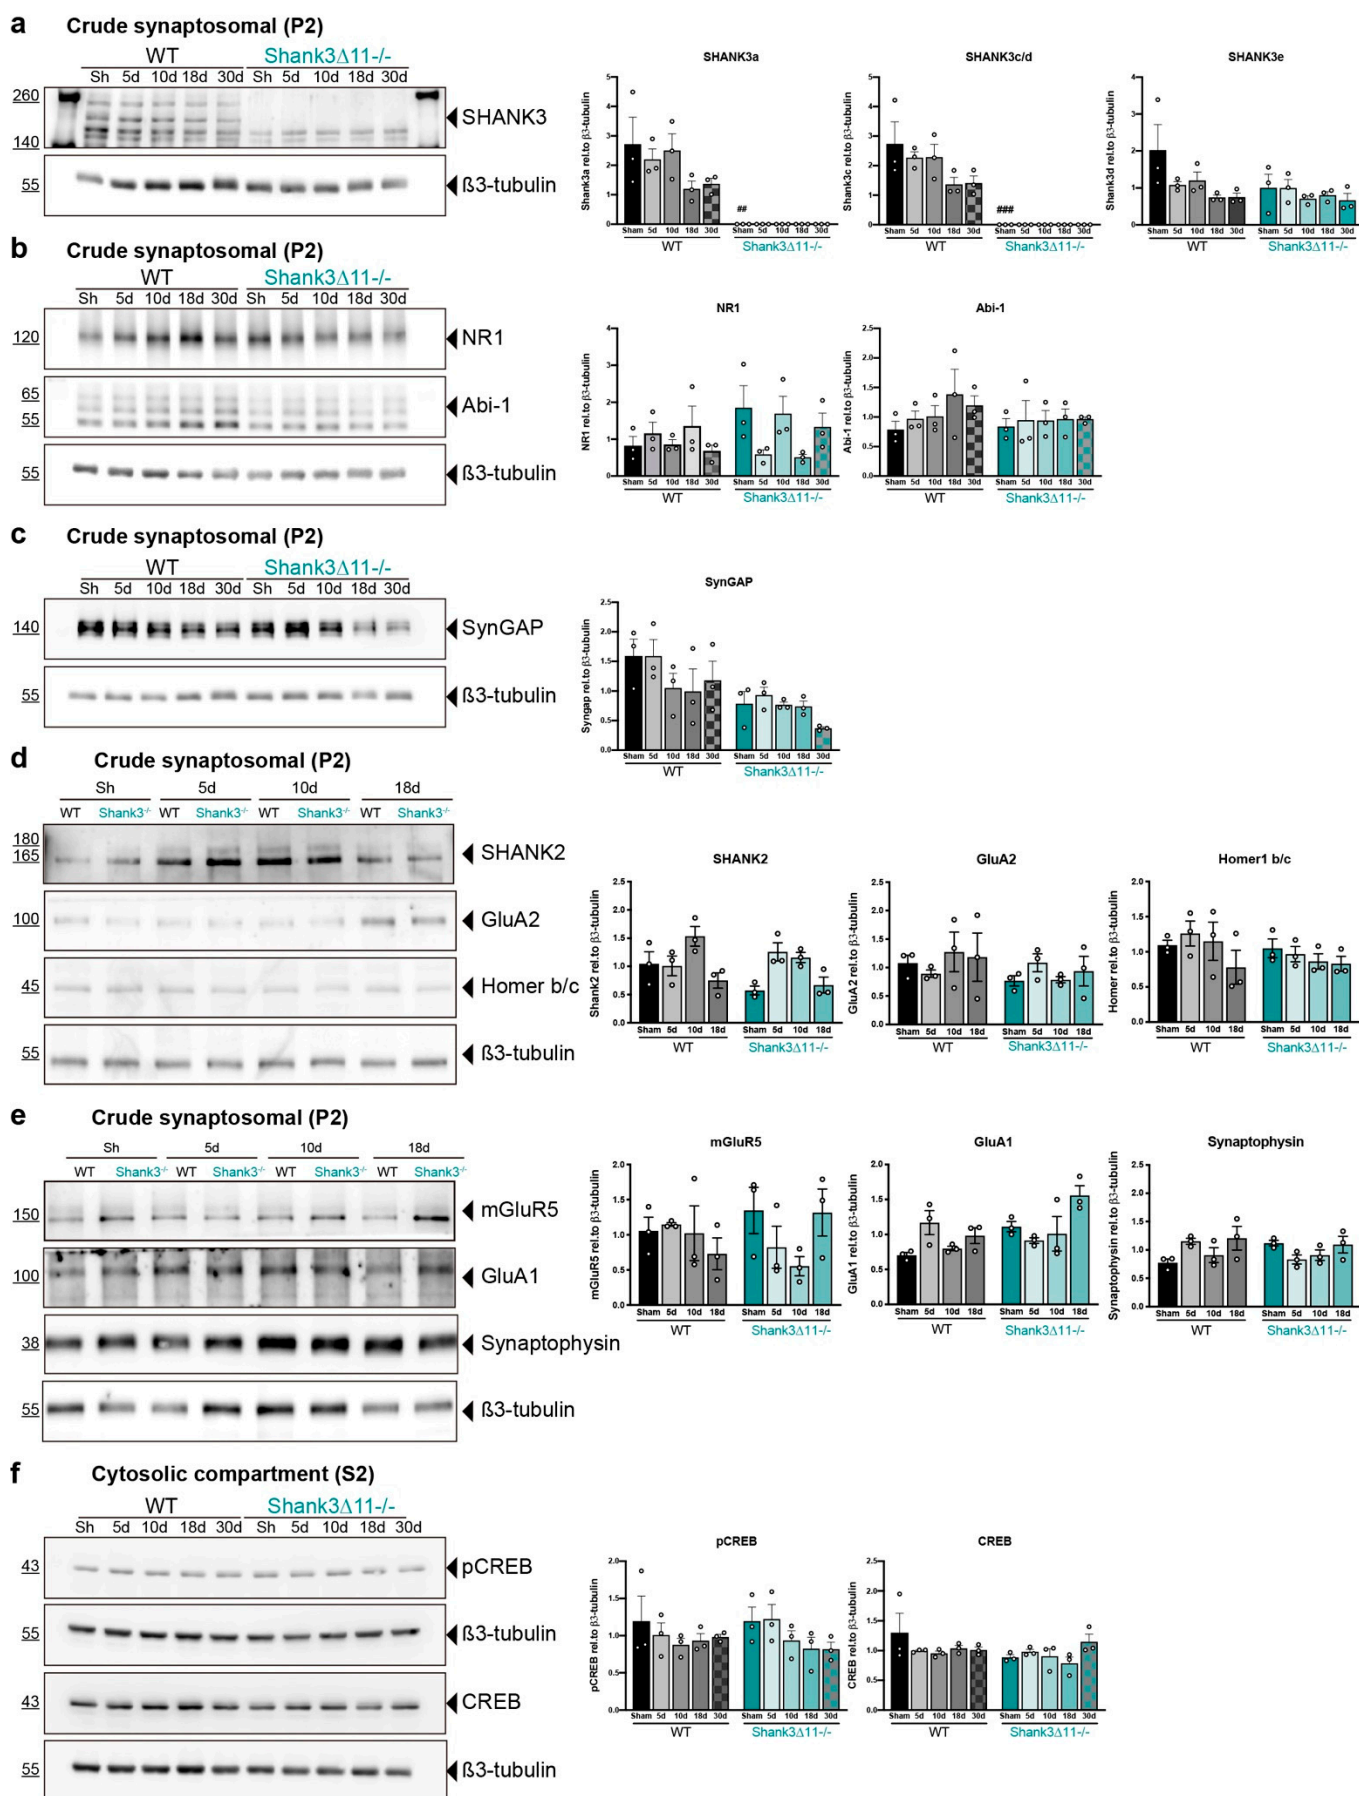

**Figure S3.** Synaptic plasticity related-proteins presented similar expression following mTBI in both wild-type and *Shank3Δ11*<sup>-/-</sup> mice. (a) Western blot analysis of the crude synaptosomal pellet (P2) of the ipsilateral hippocampus for SHANK3 isoforms (left panel) and the quantification of its expression relative to  $\beta$ -tubulin (right panel) for WT (black bars) and *Shank3Δ11*<sup>-/-</sup> mice (turquoise bars). N=3. All data are shown as mean  $\pm$  SEM. All Data sets were analyzed using two-way ANOVA (genotype  $\times$  mTBI) and Bonferroni's post hoc comparison test. [SHANK3a: genotype F(1, 20) = 72.44,  $p < 0.0001$ , mTBI F(4, 20) = 1.656,  $p = 0.1995$ ; genotype  $\times$  mTBI F(4, 20) = 1.656,  $p = 0.1995$ . SHANK3c/d: genotype F(1, 20) = 113.5,  $p < 0.0001$ ; mTBI F(4, 20) = 2.009,  $p = 0.1319$ ; genotype  $\times$  mTBI F(4, 20) = 2.009,  $p = 0.1319$ . SHANK3f: genotype F(1, 20) = 3.304,  $p = 0.0841$ ; mTBI F(4, 20) = 2.529,  $p = 0.0727$ ; genotype  $\times$  mTBI F(4, 20) = 1.223,  $p = 0.3324$ ] (b) Western blot analysis of the crude synaptosomal pellet (P2 fraction) of the ipsilateral hippocampus for NR1 and Abi-1 (left panel) and the quantification of its expression relative to  $\beta$ -tubulin (right panel) for WT (black bars) and *Shank3Δ11*<sup>-/-</sup> mice (turquoise bars). N=3. [NR1: genotype F(1, 20) = 0.9781,  $p = 0.3345$ ; mTBI F(4, 20) = 0.7158,  $p = 0.5910$ ; genotype  $\times$  mTBI F(4, 20) = 3.055,  $p = 0.0407$ ]; [Abi-1: genotype F(1, 20) = 1.032,  $p = 0.3218$ ; mTBI F(4, 20) = 0.8046,  $p = 0.5366$ ; genotype  $\times$  mTBI F(4, 20) = 0.3824,  $p = 0.8186$ ], (c) Western blot analysis of the crude synaptosomal pellet (P2 fraction) of the ipsilateral hippocampus for SynGAP and the quantification of its expression relative to  $\beta$ -tubulin (left panel) [SynGAP: genotype F(1, 20) = 14.67,  $p = 0.0010$ ; mTBI F(4, 20) = 1.673,  $p = 0.1957$ ; genotype  $\times$  mTBI F(4, 20) = 0.7040,  $p = 0.5985$ ]. N=3. (d) Western blot analysis of the crude synaptosomal pellet (P2 fraction) of the ipsilateral hippocampus for SHANK2, GluA2 and Homer1 b/c and the quantification of its expression relative to  $\beta$ -tubulin (right panel) for WT (black bars) and *Shank3Δ11*<sup>-/-</sup> mice (turquoise bars). N=3. [SHANK2: genotype F(1, 16) = 2.531,  $p = 0.1312$ ; mTBI F(3, 16) = 7.428,  $p = 0.0025$ ; genotype  $\times$  mTBI F(3, 16) = 2.286,  $p = 0.1177$ ], [GluA2: genotype F(1, 16) = 1.715,  $p = 0.2088$ ; mTBI F(3, 16) = 0.1319,  $p = 0.9402$ ; genotype  $\times$  mTBI F(3, 16) = 0.7744,  $p = 0.5252$ ], and [Homer1 b/c: genotype F(1, 16) = 1.492,  $p = 0.2396$ ; mTBI F(3, 16) = 1.357,  $p = 0.2916$ ; genotype  $\times$  mTBI F(3, 16) = 0.5472,  $p = 0.6571$ ]. (e) Western blot analysis of the crude synaptosomal pellet (P2 fraction) of the ipsilateral hippocampus for mGluR5, GluA1, and synaptophysin (left panel) and the quantification of its expression relative to  $\beta$ -tubulin (right panel) for WT (black bars) and *Shank3Δ11*<sup>-/-</sup> mice (turquoise bars). N=3. [mGluR5: genotype F(1, 16) = 0.01220,  $p = 0.9134$ ; mTBI F(3, 16) = 0.8079,  $p = 0.5078$ ; genotype  $\times$  mTBI F(3, 16) = 1.761,  $p = 0.1950$ ], [GluA1: genotype F(1, 16) = 6.784,  $p = 0.0192$ ; mTBI F(3, 16) = 3.643,  $p = 0.0356$ ; genotype  $\times$  mTBI F(3, 16) = 3.990,  $p = 0.0268$ ], [Synaptophysin: genotype F(1, 16) = 0.07776,  $p = 0.7839$ ; mTBI F(3, 16) = 1.706,  $p = 0.2060$ ; genotype  $\times$  mTBI F(3, 16) = 2.933,  $p = 0.0653$ ]. (f) Western blot analysis of the cytosolic compartment (S2 fraction) of the ipsilateral hippocampus for pCREB and CREB (left panel) and the quantification of its expression relative to  $\beta$ -tubulin (right panel) for WT (black bars) and *Shank3Δ11*<sup>-/-</sup> mice (turquoise bars). N=3. [pCREB: genotype F(1, 20) = 0.000,  $p > 0.9999$ ; mTBI F(4, 20) = 1.532,  $p = 0.2310$ ; genotype  $\times$  mTBI F(4, 20) = 0.3939,  $p = 0.8106$ ], [CREB: genotype F(1, 20) = 2.182,  $p = 0.1552$ ; mTBI F(4, 20) = 10.8836,  $p = 0.4915$ ; genotype  $\times$  mTBI F(4, 20) = 1.458,  $p = 0.2520$ ]. (##  $p < 0.01$ ; ###  $p < 0.001$ : comparison between WT sham and *Shank3Δ11*<sup>-/-</sup> sham animals).

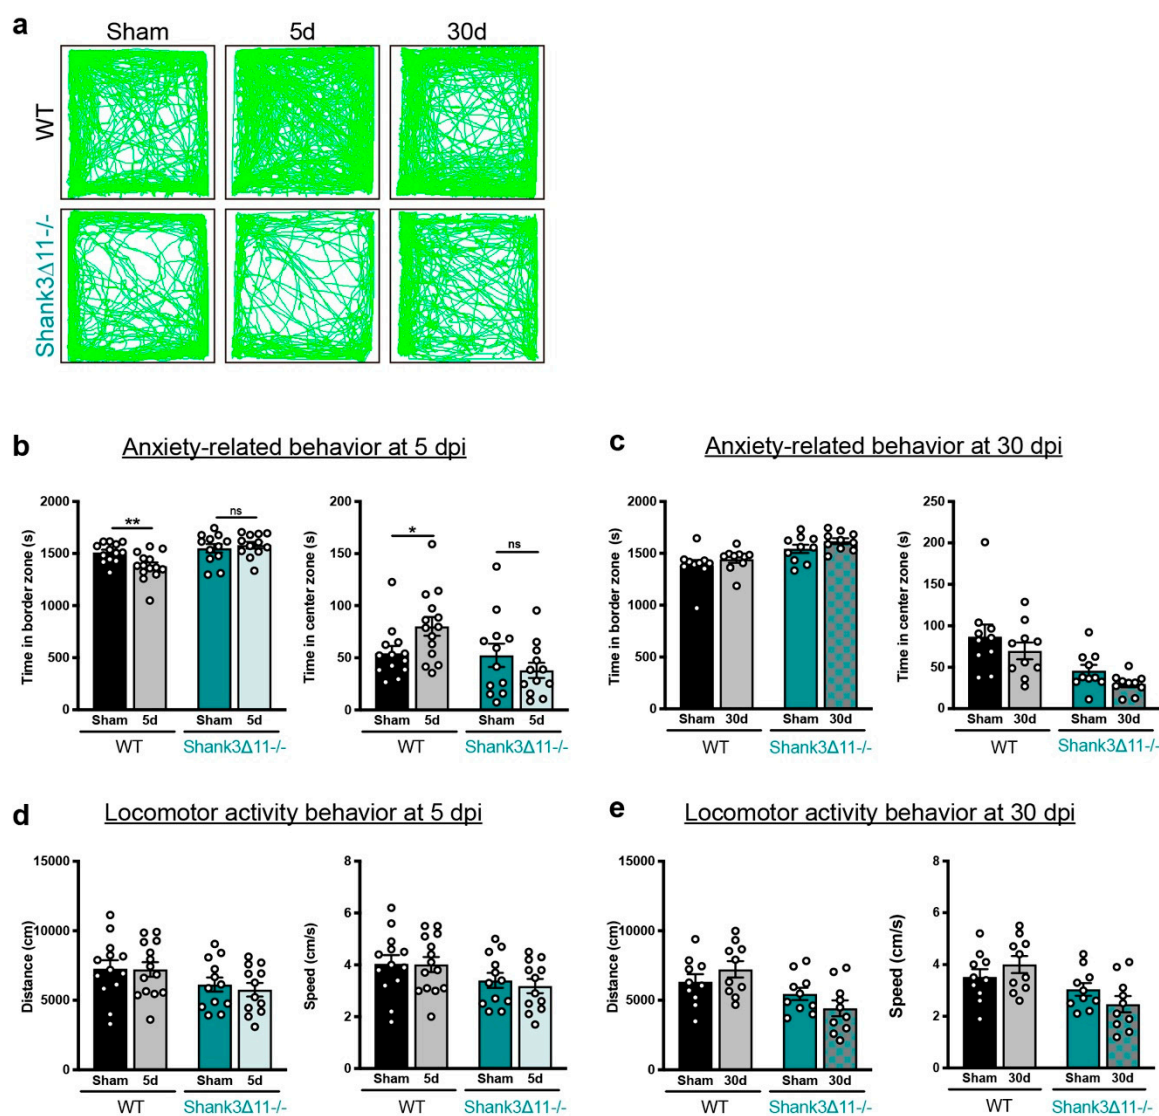

**Figure S4.** mTBI did not alter the anxious behavior of *Shank3* $\Delta 11^{-/-}$  mice and the locomotor activity of both wild-type and *Shank3* $\Delta 11^{-/-}$  mice. (a) Representative images of the tracking trajectory of WT (left upper panel) and *Shank3* $\Delta 11^{-/-}$  mice (left bottom panel) following five and thirty dpi. (b) Anxiety-related behavior at five dpi was measured by the time spent on the border or center zone of the arena of WT animals (black bars) and *Shank3* $\Delta 11^{-/-}$  (turquoise bars) mice. N=12-14. Data are shown as mean  $\pm$  SEM. Data sets were analyzed using two-way ANOVA (genotype  $\times$  mTBI) and Bonferroni's post hoc comparison test. [Duration in the border zone at five dpi: genotype  $F(1, 47) = 12.65$ ,  $p = 0.0009$ ; mTBI  $F(1, 47) = 2.309$ ,  $p = 0.1353$ ; genotype  $\times$  mTBI  $F(1, 47) = 5.805$ ,  $p = 0.0199$ ; duration in the center zone at five dpi: genotype  $F(1, 47) = 6.435$ ,  $p = 0.0146$ ; mTBI  $F(1, 47) = 0.4243$ ,  $p = 0.5189$ ; genotype  $\times$  mTBI  $F(1, 47) = 5.267$ ,  $p = 0.0262$ ]. (c) Anxiety-related behavior at 30 dpi was measured by the time spent on the border or center zone of the arena of WT animals (black bars) and *Shank3* $\Delta 11^{-/-}$  (turquoise bars) mice. N=10. Data are shown as mean  $\pm$  SEM. Data sets were analyzed using two-way ANOVA (genotype  $\times$  mTBI) and Bonferroni's post hoc comparison test. [Duration in the border zone at 30 dpi: genotype  $F(1, 36) = 17.75$ ,  $p = 0.0002$ ; mTBI  $F(1, 36) = 2.864$ ,  $p = 0.0992$ ; genotype  $\times$  mTBI  $F(1, 36) = 0.03461$ ,  $p = 0.8535$ ; duration in the center zone at 30 dpi: genotype  $F(1, 36) = 17.44$ ,  $p = 0.0002$ ; mTBI  $F(1, 36) = 2.918$ ,  $p = 0.0962$ ; genotype  $\times$  mTBI  $F(1, 36) = 0.003803$ ,  $p = 0.9512$ ]. (d) Assessment of the locomotor activity at five dpi of WT animals (black bars) and *Shank3* $\Delta 11^{-/-}$  (turquoise bars) mice. N=12-14. Data are shown as mean  $\pm$  SEM. Data sets were analyzed using two-way ANOVA (genotype  $\times$  mTBI) and Bonferroni's post hoc comparison test. [Distance at five dpi: genotype  $F(1, 47) = 5.844$ ,  $p = 0.0196$ ; mTBI  $F(1, 47) = 0.1477$ ,  $p = 0.7024$ ; genotype  $\times$  mTBI  $F(1, 47) = 0.09242$ ,  $p = 0.7625$ ; speed at five dpi: genotype  $F(1, 47) = 5.932$ ,  $p = 0.0187$ ; mTBI  $F(1, 47) = 0.1594$ ,  $p = 0.6916$ ; genotype  $\times$  mTBI  $F(1, 47)$

= 0.1018,  $p = 0.7511$ ]. (e) Assessment of the locomotor activity at 30 dpi of WT animals (black bars) and *Shank3* $\Delta 11$  $^{-/-}$  (turquoise bars) mice. N=12-14. Data are shown as mean  $\pm$  SEM. Data sets were analyzed using two-way ANOVA (genotype  $\times$  mTBI) and Bonferroni's post hoc comparison test. [Distance at 30 dpi: genotype  $F(1, 36) = 11.57$ ,  $p = 0.0017$ ; mTBI  $F(1, 36) = 0.01526$ ,  $p = 0.9024$ ; genotype  $\times$  mTBI  $F(1, 36) = 3.188$ ,  $p = 0.0826$ ; speed at 30 dpi: genotype  $F(1, 36) = 11.26$ ,  $p = 0.0019$ ; mTBI  $F(1, 36) = 0.02257$ ,  $p = 0.8814$ ; genotype  $\times$  mTBI  $F(1, 36) = 3.072$ ,  $p = 0.0882$ ] (\*  $p < 0.05$ : comparison regarding WT sham animals).



## Western blot experimental replicates

### Figure 5b, S3c (Crude synaptosomal (P2))

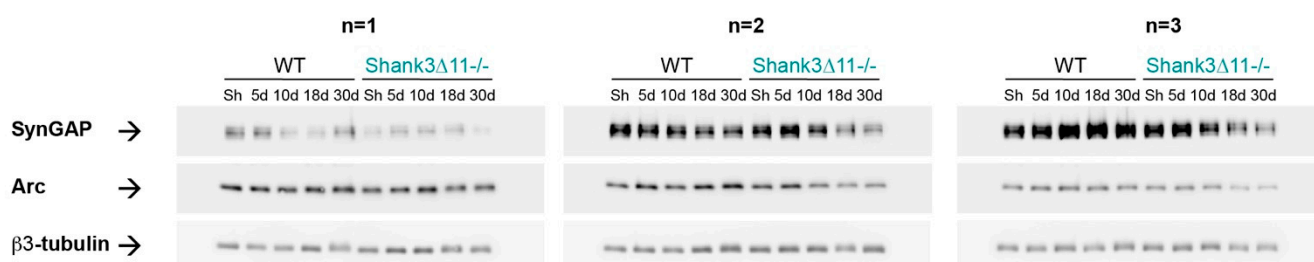

### Figure 5c (Cytosolic compartment (S2))

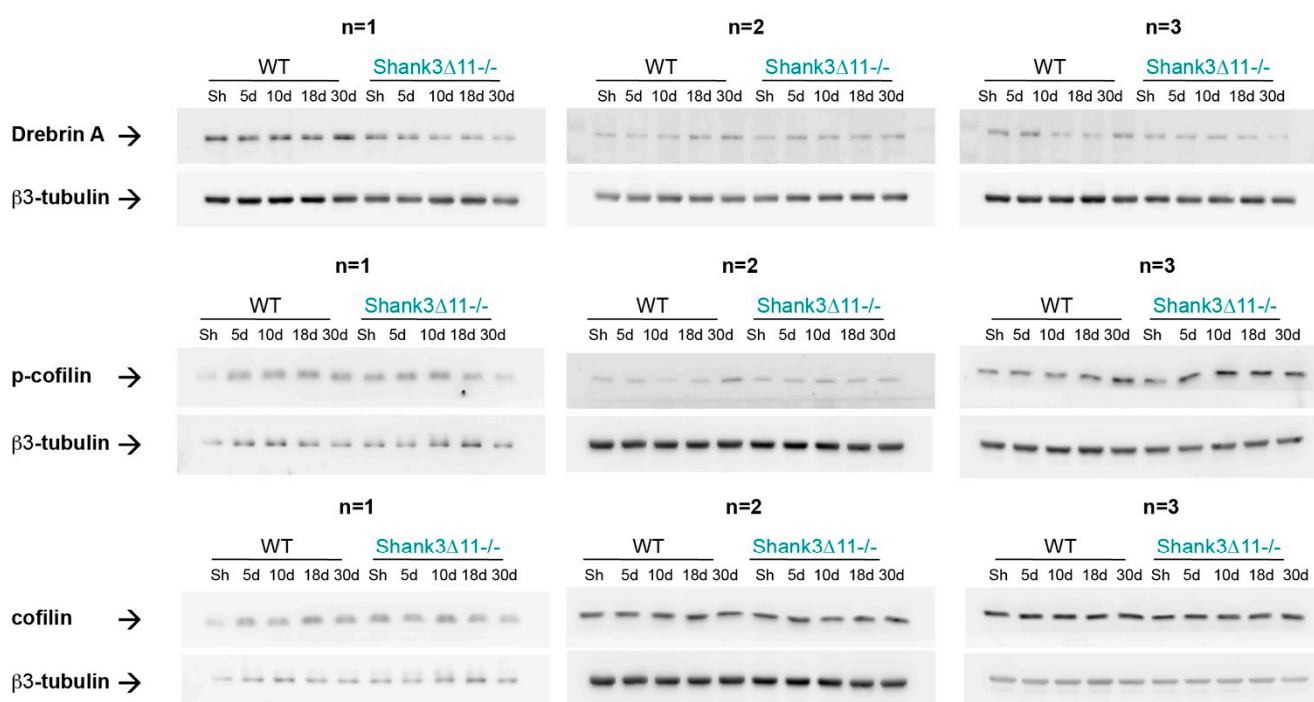

### Figure S3a (Crude synaptosomal (P2))

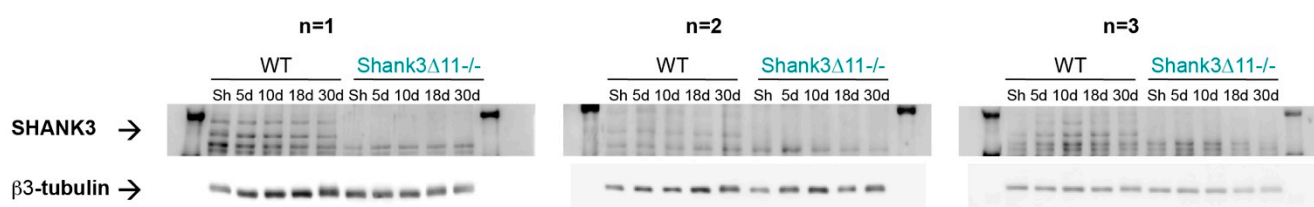

Figure S5. Western blot images for each experimental replicate used in this study. Figures 5b, 5c and 3Sa, c.

## Western blot experimental replicates

**Figure S3b** (Crude synaptosomal (P2))

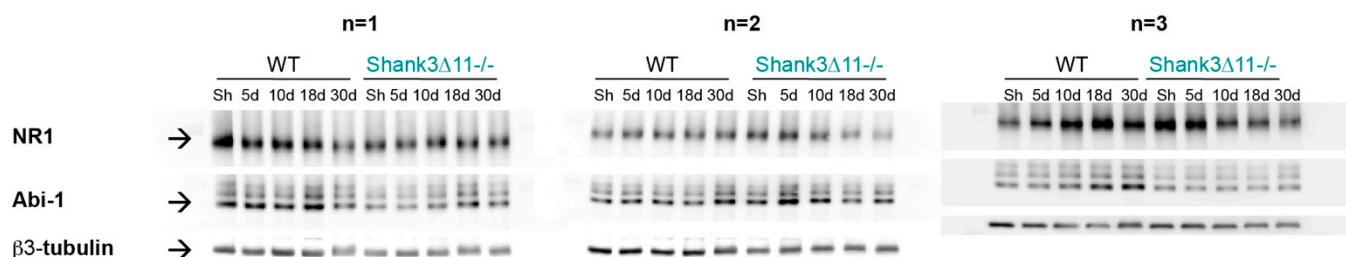

**Figure S3d** (Crude synaptosomal (P2))

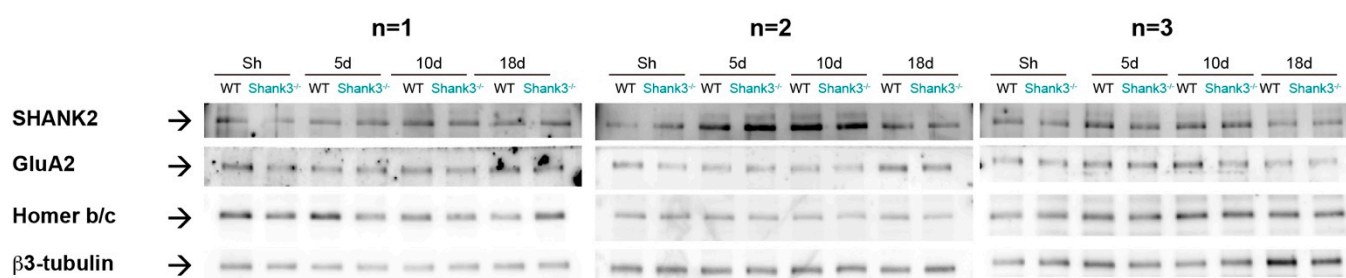

**Figure S3e** (Crude synaptosomal (P2))

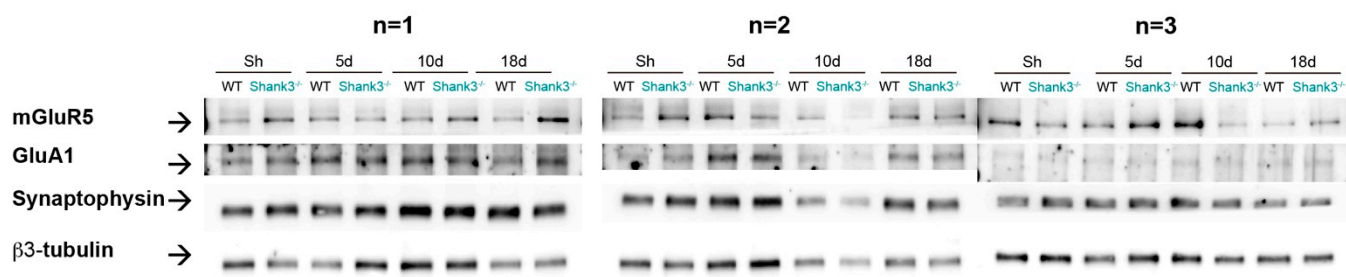

**Figure S3f** (Cytosolic compartment (S2))

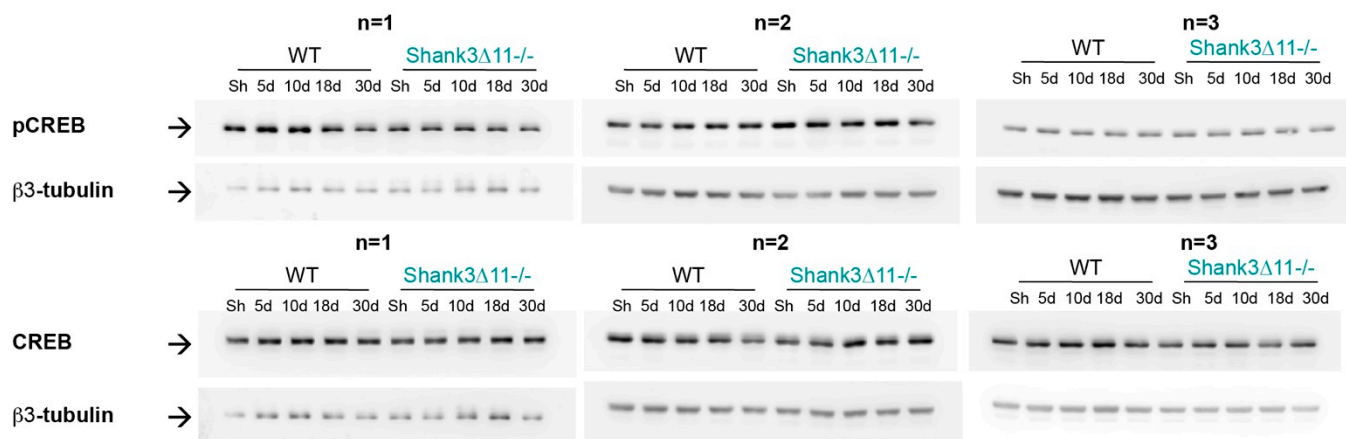

Figure S6. Western blot images for each experimental replicate used in this study. Figures 5Sb,d,e,f.
